# Supplementary material
Source: HighWire-hosted journal article supplement (http://www.cmaj.ca/highwire/filestream/59411/field_highwire_adjunct_files/6/150430-res-7-at.pdf)
Supplement: 150430-res-7-at.pdf [file 150430-res-7-at.pdf]

**Appendix 7 (as supplied by the authors):** Association between perceived usefulness and size of presented effect,  $n = 531$

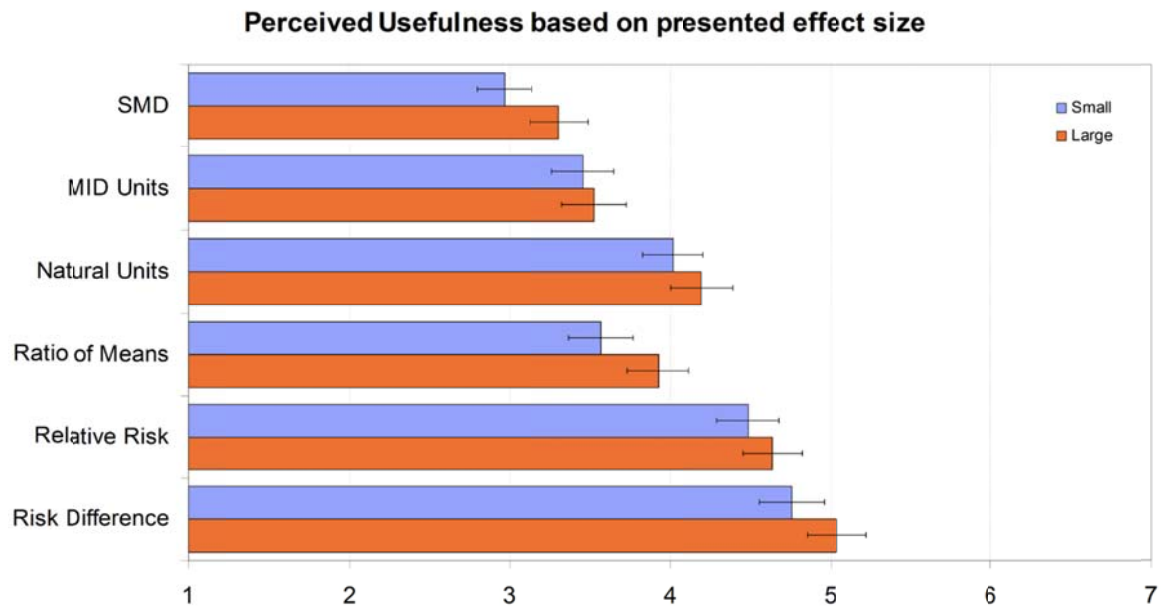

Higher scores represent higher perceived usefulness; Black bars are 95% confidence intervals
